# Supplementary material
Source: PubMed Central journal article supplement (PMC3271763)
Supplement: supp_pp.111.190223_190223SUPPLEMETAL_TABLES_AND_FIGURES.pdf [file supp_pp.111.190223_190223SUPPLEMETAL_TABLES_AND_FIGURES.pdf]

**Supplemental Table SI. Primers used in this study.** The mutation sites of *CSD1* are underlined.

| <b>Construct</b>                 | <b>Primer Set</b>                   | <b>Sequence (5' to 3')</b>           |
|----------------------------------|-------------------------------------|--------------------------------------|
| Full length CSD1<br>(and RT-PCR) | CSD1-Fw- <i>NcoI</i>                | TCTCCATGGCGAAAGGAGTTGCAGTTTT         |
|                                  | CSD1-Rv                             | TTAGCCCTGGAGACCAATGATGC              |
| CSD1 <sub>AA</sub> mutant        | G141A/V143A-Fw                      | AACGCAGGCG <u>CCCGTGCT</u> GCTTGCGGC |
|                                  | G141A/V143A-Rv                      | GCCGCAAGC <u>AGCACGGG</u> CGCCTGCGTT |
| CSD1 <sub>SL</sub> mutant        | G141S/V143L-Fw                      | AACGCAGGCT <u>CCCGTCTT</u> GCTTGCGGC |
|                                  | G141S/V143L-Rv                      | GCCGCAAGC <u>AAGACGGG</u> AGCCTGCGTT |
| CSD1 <sub>PP</sub> mutant        | G141P/V143P-Fw                      | AACGCAGG <u>CCCCGTCCT</u> GCTTGCGGC  |
|                                  | G141P/V143P-Rv                      | GCCGCAAGC <u>AGGACGGG</u> GCCTGCGTT  |
| TP <sub>CSD2</sub> for CSD1      | TP-CSD2-Fw- <i>EcoRI</i>            | CAGAATTCATGGCTGCCACCAACACAATCCT      |
|                                  | TP-CSD2-Rv- <i>NcoI</i>             | CACCATGGGAAGCACTGCAACAGCCTTCT        |
| TP <sub>CSD2</sub> -CSD1         | CSD1-Fw- <i>NcoI</i>                | TCTCCATGGCGAAAGGAGTTGCAGTTTT         |
|                                  | CSD1-Rv                             | TTAGCCCTGGAGACCAATGATGC              |
| Full length<br>CSD1-YFP          | CSD1-Fw- <i>NcoI</i>                | TCTCCATGGCGAAAGGAGTTGCAGTTTT         |
|                                  | CSD1 <sub>ns</sub> -Rv- <i>SalI</i> | CAGTCGACCCGCCCTGGAGACCAATGATG        |
| TP <sub>CSD2</sub> -CSD1-YFP     | CSD1-Fw- <i>NcoI</i>                | TCTCCATGGCGAAAGGAGTTGCAGTTTT         |
|                                  | CSD1 <sub>ns</sub> -Rv- <i>SalI</i> | CAGTCGACCCGCCCTGGAGACCAATGATG        |
| GST-CSD1                         | CSD1-Fw- <i>EcoRI</i>               | CAGAATTCATGGCGAAAGGAGTTGCAGT         |
|                                  | CSD1-Rv                             | TTAGCCCTGGAGACCAATGATGC              |
| Full length CSD2<br>(and RT-PCR) | CSD2-Fw- <i>NcoI</i>                | TCTCCATGGCTGCCACCAACACAATCCT         |
|                                  | CSD2-Rv                             | TTAGAGCGGCGTCAAGCCAATCA              |

|                                  |                                     |                                  |
|----------------------------------|-------------------------------------|----------------------------------|
| Full length<br>CSD2-YFP          | CSD2-Fw- <i>NcoI</i>                | TCTCCATGGCTGCCACCAACAATCCT       |
|                                  | CSD2ns-Rv- <i>SalI</i>              | CAGTCGACCCGAGCGGGCGTCAAGCCAATCA  |
| $\Delta$ TP-CSD2                 | $\Delta$ TP-CSD2-Fw- <i>HindIII</i> | CAAAGCTTATGTCCGCGGCGAAGAAGGCT    |
|                                  | CSD2-Rv                             | TTAGAGCGGGCGTCAAGCCAATCA         |
| $\Delta$ TP-CSD2-YFP             | $\Delta$ TP-CSD2-Fw- <i>HindIII</i> | CAAAGCTTATGTCCGCGGCGAAGAAGGCT    |
|                                  | CSD2ns-Rv- <i>SalI</i>              | CAGTCGACCCGAGCGGGCGTCAAGCCAATCA  |
| Full length CSD3<br>(and RT-PCR) | CSD3-Fw- <i>EcoRI</i>               | TCTGAATTCATGGAAGCTCCTAGAGGAAATCT |
|                                  | CSD3-Rv- <i>EcoRI</i>               | TCTGAATTCCTATAGTTTAGCATCCGCAGATG |
| GFP-full length<br>CSD3          | CSD3-Fw- <i>SmaI</i>                | CACCCGGGCCATGGAAGCTCCTAGAGGAAAT  |
|                                  | CSD3-Rv- <i>EcoRI</i>               | TCTGAATTCCTATAGTTTAGCATCCGCAGATG |
| CSD3- $\Delta$ AKL               | CSD3-Fw- <i>EcoRI</i>               | TCTGAATTCATGGAAGCTCCTAGAGGAAATCT |
|                                  | CSD3-Rv- $\Delta$ AKL               | CACTAATCCGCAGATGATTGAAGTCC       |
| GFP-CSD3- $\Delta$ AKL           | CSD3-Fw- <i>SmaI</i>                | CACCCGGGCCATGGAAGCTCCTAGAGGAAAT  |
|                                  | CSD3-Rv- $\Delta$ AKL               | CACTAATCCGCAGATGATTGAAGTCC       |
| ROXY1                            | ROXY1-Fw- <i>SmaI</i>               | CACCCGGGATGCAATACCAGACAGAATC     |
|                                  | ROXY1-Rv- <i>BamHI</i>              | CAGGATCCTCAGAGCCAGAGAGCG         |
| GRXcp                            | GRXcp-Fw- <i>SmaI</i>               | CACCCGGGATGGCTCTCCGATCTGTCAA     |
|                                  | GRXcp-Rv- <i>BamHI</i>              | CAGGATCCTCAAGAGCACATAGCTTTCTCCA  |

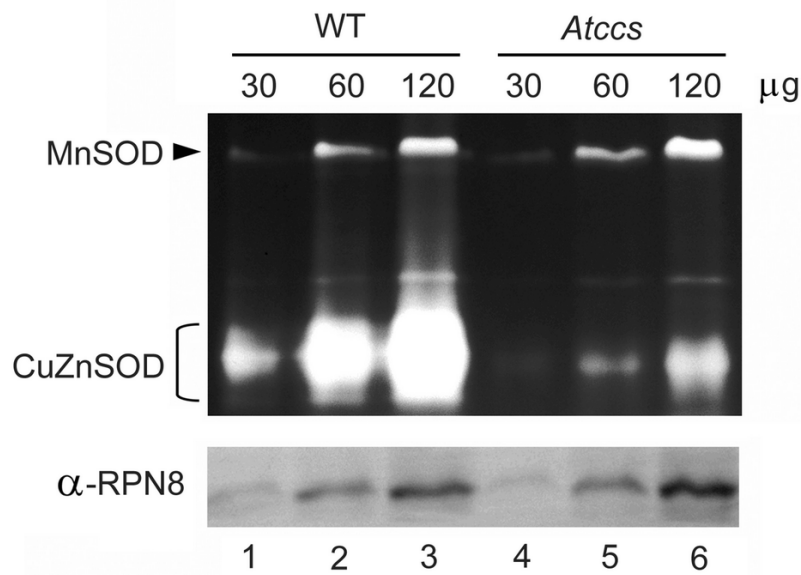

**Supplemental Figure S1. Residual CSD activities analyzed in Arabidopsis *Atccs*.** It has been reported previously that Arabidopsis with various SOD activity profiles among different tissues (Chu et al., 2005). The level of CSD activity was high in flowers and siliques but low in rosette leaves and cauline leaves. In this figure, cellular extracts of 45-d-old Arabidopsis wild-type (WT) and *Atccs* flowers were analyzed for SOD activity with different protein amounts as indicated. RPN8 was a loading control. Here, the *Atccs* mutant clearly showed residual CSD activity (lanes 5 and 6; about 6% to 30% of the WT levels), which indicates a CCS-independent CSD activation pathway in Arabidopsis. The percentage of CCS-independent activity represents the mean of at least 4 replicates and was calculated relative to the WT activity.

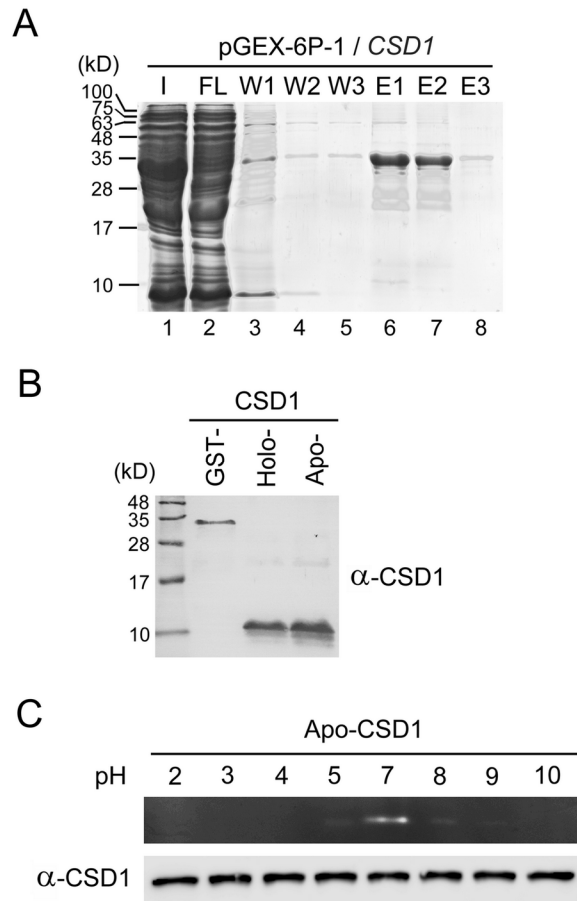

**Supplemental Figure S2. Affinity purification of CSD1 and its activity under various pH**

**treatments.** A, *CSD1* gene was cloned into the pGEX-6P-1 vector for fusion with a GST tag.

5 Samples at each step underwent SDS-PAGE and Coomassie Brilliant Blue staining. I, IPTG

induced cellular extract. F, flow through extract. W1 to W3, wash with buffer. E1 to E3,

GST-tagged protein elution. B, Fifty nanograms each of purified GST-, and GST-removed Holo-

and Apo-CSD1 was analyzed by immunoblotting. C, The activity of Apo-CSD1 (870 ng)

incubated with 0.1  $\mu$ M  $\text{CuSO}_4$  and 20  $\mu$ M  $\text{ZnSO}_4$  under various pH treatments as indicated.

10 Buffers for each pH were: 0.2 M  $\text{Na}_2\text{HPO}_4$  and 0.1 M citrate for pH 2 to 7, and 0.2 M

glycine-NaOH for pH 9 and 10. A replicate of 50-ng Apo-CSD1 was subjected to the same

treatments, then analyzed for protein level by immunoblotting.

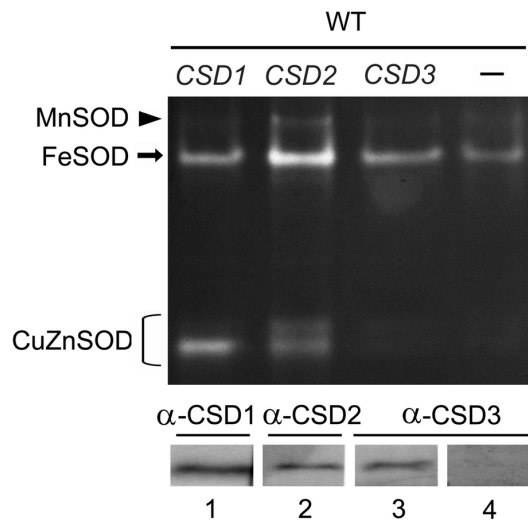

**Supplemental Figure S3. Characterization of individual CSD activity in Arabidopsis protoplasts.** *CSD1*, *CSD2* and *CSD3* gene was overexpressed in WT protoplasts, then activity (top) and protein level (bottom) were analyzed. Lane 4 contains protoplast extracts without transformation used as a control.
